# Supplementary material
Source: PubMed Central journal article supplement (PMC2756174)
Supplement: NIHMS124815-supplement-1_si_001.pdf [file NIHMS124815-supplement-1_si_001.pdf]

Supporting information for:

**MUTATION OF THE ACTIVE SITE CARBOXY-LYSINE (K70) OF OXA-1  $\beta$ -  
LACTAMASE RESULTS IN A DEACYLATION-DEFICIENT ENZYME**

Kyle D. Schneider, Christopher R. Bethel, Anne M. Distler, Andrea M. Hujer, Robert A.

Bonomo and David A. Leonard

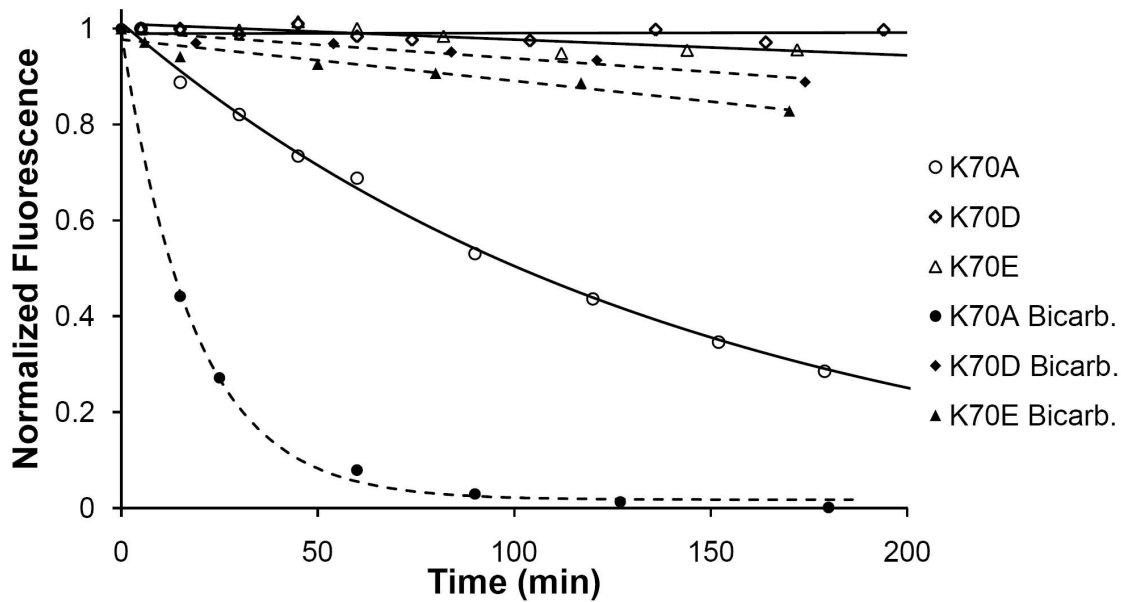

**Figure S1.** Ampicillin deacylation rates for three K70 variants in the absence and presence sodium bicarbonate. Rates were determined as described in Materials and Methods under the heading *Deacylation Rate Determination*. The buffer used was 50 mM  $\text{NaH}_2\text{PO}_4$ , pH 7.4 with or without 9 mM  $\text{NaHCO}_3$ .
